# Supplementary material
Source: MDPI journal article supplement (https://www.mdpi.com/1718-7729/28/1/51)
Supplement: s1 [file s1]

Archive with 1 entries (1 files):
- curroncol-1033024 supp.pdf
