# Supplementary material for: Preferences of Canadian Patients and Physicians for Treatment of HR+/HER2− Advanced Breast Cancer
Source: MDPI journal article supplement (doi:10.3390/curroncol28010051), 2021-01-14
Supplement: s1 [file s1 › curroncol-1033024 supp.pdf]

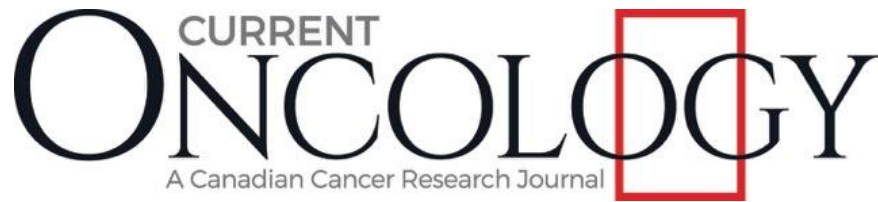

**Supplemental Materials for**  
**Preferences of Canadian Patients and Physicians for Treatment of HER2-/HR+ Advanced**  
**Breast Cancer**

Stellato D, BS; Thabane M, PhD; Eichten C, BA; Delea TE, MSIA

**Listing of Supplemental Material(s):**

Supplemental Table S1: Patients' reported feelings of anxiety and depression

Supplemental Table S2: Patients' perceptions regarding control of their cancer

Supplemental Table S3: Patients fear of cancer progression

Supplemental Table S4: Patients' perceptions regarding the effects of their cancer on fertility

Supplementary Materials 1: Survey instrument

**Supplemental Table S1. Patients' reported feelings of anxiety and depression**

|                                             | Frequency That Patients Were Bothered by These Problems Over Past 2 Weeks, N (%) |                             |                            |                  |
|---------------------------------------------|----------------------------------------------------------------------------------|-----------------------------|----------------------------|------------------|
|                                             | Not at all                                                                       | Fewer than half of the days | More than half of the days | Nearly every day |
| <b>Primary Analysis (N=17)</b>              |                                                                                  |                             |                            |                  |
| Feeling nervous, anxious, or on edge        | 4 (23.5)                                                                         | 6 (35.3)                    | 6 (35.3)                   | 1 (5.9)          |
| Not being able to stop or control worrying  | 5 (29.4)                                                                         | 8 (47.1)                    | 4 (23.5)                   | 0                |
| Feeling down, depressed, or hopeless        | 5 (29.4)                                                                         | 7 (41.2)                    | 5 (29.4)                   | 0                |
| Little interest or pleasure in doing things | 5 (29.4)                                                                         | 7 (41.2)                    | 5 (29.4)                   | 0                |
| <b>All Patients (N=48)</b>                  |                                                                                  |                             |                            |                  |
| Feeling nervous, anxious, or on edge        | 12 (24.5)                                                                        | 22 (44.9)                   | 12 (24.5)                  | 3 (6.1)          |
| Not being able to stop or control worrying  | 19 (38.8)                                                                        | 19 (38.8)                   | 8 (16.3)                   | 3 (6.1)          |
| Feeling down, depressed, or hopeless        | 21 (42.9)                                                                        | 18 (36.7)                   | 8 (16.3)                   | 2 (4.1)          |
| Little interest or pleasure in doing things | 22 (44.9)                                                                        | 17 (34.7)                   | 9 (18.4)                   | 1 (2.0)          |

**Supplemental Table S2. Patients' perceptions regarding control of their cancer**

|                                                                             | Extent to which Patients Agree with Statements Regarding Their Cancer, N (%) |          |                            |          |                |
|-----------------------------------------------------------------------------|------------------------------------------------------------------------------|----------|----------------------------|----------|----------------|
|                                                                             | Strongly Disagree                                                            | Disagree | Neither Agree nor Disagree | Agree    | Strongly Agree |
| <b>Primary Analysis (N=17)</b>                                              |                                                                              |          |                            |          |                |
| I can definitely influence the course of the cancer                         | 0                                                                            | 2 (11.8) | 6 (35.3)                   | 8 (47.1) | 1 (5.9)        |
| My doctor can definitely influence the course of the cancer                 | 0                                                                            | 1 (5.9)  | 4 (23.5)                   | 8 (47.1) | 4 (23.5)       |
| The key people in my life can definitely influence the course of the cancer | 2 (11.8)                                                                     | 2 (11.8) | 6 (35.3)                   | 5 (29.4) | 2 (11.8)       |

|                                                                                          |         |          |           |           |           |
|------------------------------------------------------------------------------------------|---------|----------|-----------|-----------|-----------|
| By taking extra care of myself I can influence the course of the cancer                  | 0       | 1 (5.9)  | 7 (41.2)  | 7 (41.2)  | 2 (11.8)  |
| By living healthily I can influence the course of the cancer.                            | 0       | 1 (5.9)  | 7 (41.2)  | 7 (41.2)  | 2 (11.8)  |
| If I follow the advice of my doctor, I can definitely influence the course of the cancer | 0       | 0        | 4 (23.5)  | 12 (70.6) | 1 (5.9)   |
| I can influence the course of the cancer by fighting against it.                         | 1 (5.9) | 3 (17.6) | 4 (23.5)  | 6 (35.3)  | 3 (17.6)  |
| <b>All Patients (N=48)</b>                                                               |         |          |           |           |           |
| I can definitely influence the course of the cancer                                      | 1 (2.1) | 5 (10.4) | 12 (25.0) | 24 (50.0) | 6 (12.5)  |
| My doctor can definitely influence the course of the cancer                              | 0       | 3 (6.3)  | 7 (14.6)  | 23 (47.9) | 15 (31.3) |
| The key people in my life can definitely influence the course of the cancer              | 3 (6.3) | 7 (14.6) | 14 (29.2) | 16 (33.3) | 8 (16.7)  |
| By taking extra care of myself I can influence the course of the cancer                  | 0       | 4 (8.3)  | 12 (25.0) | 22 (45.8) | 10 (20.8) |
| By living healthily I can influence the course of the cancer.                            | 1(2.1)  | 3 (6.3)  | 11 (22.9) | 25 (52.1) | 8 (16.7)  |
| If I follow the advice of my doctor, I can definitely influence the course of the cancer | 0       | 1 (2.1)  | 10 (20.8) | 26 (54.2) | 11 (22.9) |
| I can influence the course of the cancer by fighting against it.                         | 3 (6.3) | 7 (14.6) | 10 (20.8) | 14 (29.2) | 14 (29.2) |

### Supplemental Table S3. Patients fear of cancer progression

|  | Extent to Which Patients Worry about Future Diagnostic Tests, Other Types of Cancer, and Their Cancer Getting Worse, N (%) |              |          |           |
|--|----------------------------------------------------------------------------------------------------------------------------|--------------|----------|-----------|
|  | Not at All                                                                                                                 | A little bit | Somewhat | Very much |

|                                |           |           |           |           |
|--------------------------------|-----------|-----------|-----------|-----------|
| <b>Primary Analysis (N=17)</b> |           |           |           |           |
| Future diagnostic tests        | 2 (11.8)  | 4 (23.5)  | 5 (29.4)  | 6 (35.3)  |
| Another type of cancer         | 6 (35.3)  | 6 (35.3)  | 2 (11.8)  | 3 (17.6)  |
| My cancer getting worse        | 1 (5.9)   | 1 (5.9)   | 2 (11.8)  | 13 (76.5) |
| <b>All Patients (N=48)</b>     |           |           |           |           |
| Future diagnostic tests        | 10 (20.8) | 10 (20.8) | 18 (37.5) | 10 (20.8) |
| Another type of cancer         | 13 (27.1) | 15 (31.3) | 12 (25.0) | 8 (16.7)  |
| My cancer getting worse        | 2 (4.2)   | 3 (6.3)   | 11 (22.9) | 32 (66.7) |

**Supplemental Table S4. Patients' perceptions regarding the effects of their cancer on fertility**

|                                                                                                                    | Extent to which Patients Agree with Statements Regarding Their Cancer, N (%) |          |                            |          |                |
|--------------------------------------------------------------------------------------------------------------------|------------------------------------------------------------------------------|----------|----------------------------|----------|----------------|
|                                                                                                                    | Strongly Disagree                                                            | Disagree | Neither Agree nor Disagree | Agree    | Strongly Agree |
| <b>Primary Analysis (N=17)</b>                                                                                     |                                                                              |          |                            |          |                |
| The thought of telling my (potential) spouse/partner that I may be unable to have children makes me uncomfortable. | 6 (35.3)                                                                     | 2 (11.8) | 8 (47.1)                   | 1 (5.9)  | 0              |
| I am worried about passing on a genetic risk for cancer to my children.                                            | 1 (5.9)                                                                      | 0        | 1 (5.9)                    | 8 (47.1) | 7 (41.2)       |
| I am cautious about having (more) children because I might not be around to raise them.                            | 3 (17.6)                                                                     | 3 (17.6) | 5 (29.4)                   | 2 (11.8) | 4 (23.5)       |
| I will be happy with life whether or not I have (more) children someday.                                           | 1 (5.9)                                                                      | 1 (5.9)  | 6 (35.3)                   | 7 (41.2) | 2 (11.8)       |
| <b>All Patients (N=48)</b>                                                                                         |                                                                              |          |                            |          |                |
| The thought of telling my (potential) spouse/partner that I may be unable to                                       | 16 (32.7)                                                                    | 6 (12.2) | 25 (51.0)                  | 2 (4.1)  | 0              |

---

|                                                                                         |          |         |           |           |           |
|-----------------------------------------------------------------------------------------|----------|---------|-----------|-----------|-----------|
| have children makes me uncomfortable.                                                   |          |         |           |           |           |
| I am worried about passing on a genetic risk for cancer to my children.                 | 4 (8.2)  | 3 (6.1) | 8 (16.3)  | 18 (36.7) | 16 (32.7) |
| I am cautious about having (more) children because I might not be around to raise them. | 7 (14.3) | 3 (6.1) | 27 (55.1) | 2 (4.1)   | 10 (20.4) |
| I will be happy with life whether or not I have (more) children someday.                | 5 (10.2) | 1 (2.0) | 21 (42.9) | 12 (24.5) | 10 (20.4) |

---

### Supplementary Materials 1. Survey instrument

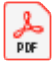

Acrobat Document
